# Supplementary material
Source: PubMed Central journal article supplement (PMC9340815)
Supplement: NIHMS1816616-supplement-1.pdf [file NIHMS1816616-supplement-1.pdf]

## **Supplemental Information**

### **Cholesterol and matrisome pathways dysregulated in *APOE* $\epsilon$ 4 human astrocytes and microglia**

Julia TCW, Lu Qian, Nina H. Pipalia, Michael J. Chao, Shuang A. Liang, Yang Shi, Bharat R. Jain, Sarah E. Bertelsen, Manav Kapoor, Edoardo Marcora, Elizabeth Sikora, Elizabeth J. Andrews, Alessandra C. Martini, Celeste M. Karch, Elizabeth Head, David M. Holtzman, Bin Zhang, Minghui Wang, Frederick R. Maxfield, Wayne W. Poon, Alison M. Goate

| <i>APOE</i> genotype | Gender | Disease status (CDR at biopsy) | Analysis assigned ID (Randomization) | GRS score | GRS – APOE score | HAPLO1 / HAPLO2            | Ethnicity | Age of onset | Age at skin biopsy/ PBMC collection | Source of hiPSC reprogramming | Karyotype | PI HAT of fibroblast and hiPSC (GSA) |
|----------------------|--------|--------------------------------|--------------------------------------|-----------|------------------|----------------------------|-----------|--------------|-------------------------------------|-------------------------------|-----------|--------------------------------------|
| 33                   | Female | Control (0)                    | ID1                                  | 0.01831   | 0.0191           | hap.02/ hap.23             | Caucasian | -            | 76                                  | Fibroblasts                   | Normal    | 0.9999                               |
| 33                   | Female | Control (0)                    | ID3                                  | -0.00117  | -0.00112         | hap.09/ hap.09             | Caucasian | -            | 81                                  | Fibroblasts                   | Normal    | 1                                    |
| 33                   | Female | AD (0.5)                       | ID5                                  | 0.00692   | 0.00722          | hap.oth er02/ha p.other 04 | Caucasian | 82           | 94                                  | Fibroblasts                   | Normal    | 1                                    |
| 33                   | Female | AD (2)                         | ID4                                  | 0.0074    | 0.00772          | hap.oth er01.ha p.08       | Caucasian | 78           | 81                                  | Fibroblasts                   | Normal    | 0.9998                               |
| 33                   | Male   | Control (0)                    | ID2                                  | -0.00045  | -0.00046         | hap.02/ hap.20             | Caucasian | -            | 67                                  | Fibroblasts                   | Normal    | 1                                    |
| 33                   | Male   | AD (0.5)                       | ID6                                  | 0.01579   | 0.01647          | hap.11/ hap.oth er05       | Caucasian | -            | 87                                  | Fibroblasts                   | Normal    | 0.9997                               |
| 33                   | Male   | Control (0)                    | ID7                                  | 0.0093    | 0.0097           | NA.01/ hap.oth er06        | Caucasian | -            | 83                                  | PBMCs                         | Normal    | 1                                    |
| 44                   | Female | Control (0)                    | ID9                                  | 0.06670   | 0.01086          | hap.oth er03/ha p.other 07 | Caucasian | -            | 76                                  | Fibroblasts                   | Normal    | 1                                    |
| 44                   | Female | AD (2)                         | ID8                                  | 0.05958   | 0.00343          | hap.03/ NA.02              | Caucasian | 64           | 72                                  | Fibroblasts                   | Normal    | 1                                    |
| 44                   | Female | AD (2)                         | ID12                                 | 0.06779   | 0.01203          | hap.03/ NA.04              | Caucasian | 61           | 72                                  | Fibroblasts                   | Normal    | 0.9999                               |
| 44                   | Male   | AD (0.5)                       | ID10                                 | 0.06078   | 0.00468          | hap.03/ hap.03             | Caucasian | 77           | 80                                  | Fibroblasts                   | Normal    | 1                                    |
| 44                   | Male   | AD (0.5)                       | ID11                                 | 0.06366   | 0.00772          | hap.17/ NA.03              | Caucasian | 83           | 80                                  | Fibroblasts                   | Normal    | 1                                    |
| 44                   | Male   | AD (3)                         | ID13                                 | 0.06251   | 0.00652          | hap.17/ hap.17             | Caucasian | 71           | 78                                  | Fibroblasts                   | Normal    | 0.9997                               |

**Table S1 Genetic and clinical information of the hiPSC lines, Related to Figure 1.**

Abbreviations: *APOE*, apolipoprotein E; GRS, genetic risk score; AD, Alzheimer’s disease; PBMC, peripheral blood mononuclear cell; CDR, clinical dementia rating; HAPLO, *APOE* local haplotype against 1000G common haplotype; GSA, global screening array.

**Microglia: APOE 44 vs 33**

| Enriched pathways            | Diseases or Functions annotation | p-Value  | Predicted Activation State | Activation z-score |
|------------------------------|----------------------------------|----------|----------------------------|--------------------|
| Cholesterol biosynthesis     | Synthesis of cholesterol         | 8.63E-42 | Increased                  | 2.216              |
|                              | Metabolism of cholesterol        | 1.74E-26 | Increased                  | 2.216              |
|                              | Steroid metabolism               | 3.91E-23 | Increased                  | 2.216              |
|                              | Synthesis of terpenoid           | 4.54E-18 | Increased                  | 2.201              |
| Lysosome                     | Accumulation of lipid            | 4.9E-17  | Increased                  | 2.805              |
|                              | Accumulation of cholesterol      | 9.53E-10 | Increased                  | 2.765              |
|                              | Catabolism of lipid              | 4.17E-16 | Decreased                  | -2.764             |
|                              | Cleavage of lipid                | 1.9E-09  | Decreased                  | -3.364             |
| HDL-mediated lipid transport | Efflux of cholesterol            | 1.87E-14 | Decreased                  | -2.382             |
|                              | Cholesterol transport            | 2.11E-16 | Decreased                  | -2.163             |
|                              | Removal of lipid                 | 2.79E-14 | Decreased                  | -2.109             |

Abbreviations: APOE, apolipoprotein E; HDL, high density lipoprotein

**Astrocytes: APOE 44 vs 33**

| Enriched pathways        | Diseases or Functions annotation | p-Value  | Predicted Activation State | Activation z-score |
|--------------------------|----------------------------------|----------|----------------------------|--------------------|
| Cholesterol biosynthesis | Synthesis of cholesterol         | 7.03E-37 | Increased                  | 2.216              |
|                          | Metabolism of cholesterol        | 4.92E-20 | Increased                  | 2.216              |
|                          | Steroid metabolism               | 6.43E-18 | Increased                  | 2.216              |
|                          | Synthesis of terpenoid           | 3.02E-15 | Increased                  | 2.201              |

**Table S2 Ingenuity pathway z-score of enriched pathways from DEG analysis comparing APOE genotype in hiPSC-microglia and astrocytes, Related to Figure 2.**

### hiPSC-mixed cortical cultures (corrected): APOE 44 vs 33

| Enriched pathways    | Diseases or Functions annotation | p-Value  | Predicted Activation State | Activation z-score |
|----------------------|----------------------------------|----------|----------------------------|--------------------|
| Matrisome associated | Chemotaxis                       | 2.9E-31  | Increased                  | 5.729              |
|                      | Chemotaxis of myeloid cells      | 1.45E-12 | Increased                  | 3.976              |
|                      | Chemotaxis of phagocytes         | 1.88E-11 | Increased                  | 3.721              |
|                      | Activation of phagocytes         | 1.41E-17 | Increased                  | 3.513              |
|                      | Inflammatory response            | 5.39E-26 | Increased                  | 4.657              |
|                      | Synthesis of lipid               | 4.38E-16 | Increased                  | 2.879              |
|                      | Synthesis of eicosanoid          | 1.66E-11 | Increased                  | 2.397              |
| Core matrisome       | Cell movement                    | 5.4E-09  | Increased                  | 2.667              |
|                      | Migration of cells               | 1.3E-08  | Increased                  | 2.257              |

### AD brains including APOE 44 carriers: Severe vs Mild

| Enriched pathways    | Diseases or Functions annotation | p-Value   | Predicted Activation State | Activation z-score |
|----------------------|----------------------------------|-----------|----------------------------|--------------------|
| Matrisome associated | Cell movement of myeloid cells   | 1.77E-10  | Increased                  | 3.152              |
|                      | Chemotaxis of myeloid cells      | 2.50E-08  | Increased                  | 3.055              |
|                      | Recruitment of phagocytes        | 2.28E-10  | Increased                  | 2.953              |
|                      | Cell movement of phagocytes      | 1.41E-08  | Increased                  | 2.918              |
|                      | Chemotaxis of phagocytes         | 3.49E-07  | Increased                  | 2.73               |
|                      | Recruitment of myeloid cells     | 1.15E-07  | Increased                  | 2.615              |
|                      | Activation of cells              | 1.66E-13  | Increased                  | 3.46               |
|                      | Inflammatory response            | 1.38E-10  | Increased                  | 3.098              |
|                      | Immune response of cells         | 1.56E-08  | Increased                  | 2.975              |
|                      | Synthesis of lipid               | 4.13E-08  | Increased                  | 3.285              |
|                      | Synthesis of fatty acid          | 4.10E-06  | Increased                  | 2.926              |
|                      | Synthesis of eicosanoid          | 1.88E-06  | Increased                  | 2.759              |
|                      | Synthesis of prostaglandin       | 3.29E-06  | Increased                  | 2.6                |
|                      | Synthesis of prostaglandin E2    | 1.07E-05  | Increased                  | 2.408              |
| Synthesis of steroid | 5.77E-06                         | Increased | 1.547                      |                    |
| Matrisome            | Cell movement of myeloid cells   | 7.5E-12   | Increased                  | 3.376              |
|                      | Chemotaxis of myeloid cells      | 5.6E-07   | Increased                  | 3.214              |
|                      | Cell movement of phagocytes      | 3.2E-10   | Increased                  | 3.172              |
|                      | Recruitment of phagocytes        | 8E-10     | Increased                  | 2.99               |
|                      | Chemotaxis of phagocytes         | 4.7E-06   | Increased                  | 2.907              |
|                      | Recruitment of myeloid cells     | 1.9E-07   | Increased                  | 2.673              |
|                      | Migration of phagocytes          | 3.5E-12   | Increased                  | 2.315              |
|                      | Inflammatory response            | 3.1E-11   | Increased                  | 3.562              |
|                      | Activation of cells              | 3E-11     | Increased                  | 3.557              |
|                      | Immune response of cells         | 6E-08     | Increased                  | 2.719              |
|                      | Activation of phagocytes         | 2.4E-07   | Increased                  | 2.36               |
|                      | Synthesis of fatty acid          | 6E-06     | Increased                  | 3.107              |
|                      | Synthesis of eicosanoid          | 7.6E-07   | Increased                  | 2.956              |

|                |                            |         |           |       |
|----------------|----------------------------|---------|-----------|-------|
|                | Synthesis of prostaglandin | 4.2E-06 | Increased | 2.277 |
| Core matrisome | Cell movement              | 2.9E-05 | Increased | 2.378 |
|                | Migration of cells         | 0.00015 | Increased | 2.299 |
|                | Attachment of cells        | 1.6E-08 | Increased | 2.217 |

**Table S3 Ingenuity pathway z-score of enriched pathways from the DEG analysis comparing *APOE* 44 vs. *APOE* 33 in hiPSC-mixed cortical cultures and severe vs. mild dementia in AD brains including *APOE* 4 carriers, Related to Figure 2 and 4.**

| Individual ID | Analysis assigned fibroblast ID | APOE genotype | Isogenic APOE hiPSC line ID | Transcriptome ID | Karyotype | PI HAT |
|---------------|---------------------------------|---------------|-----------------------------|------------------|-----------|--------|
| Indiv1        | ID8                             | 33            | TCW1E33-1C6                 | TCW1_33A         | Normal    | 0.9999 |
|               |                                 | 33            | TCW1E33-1C8                 | TCW1_33B         | Normal    | 0.9999 |
|               |                                 | 33            | TCW1E33-1F1                 | TCW1_33C         | Normal    | 1      |
|               |                                 | 44            | TCW1E44-2C2                 | TCW1_44a         | Normal    | 1      |
|               |                                 | 44            | TCW1E44-2E3                 | TCW1_44b         | Normal    | 1      |
|               |                                 | 44            | TCW1E44-1D1                 | TCW1_44c         | Normal    | 0.9999 |
|               |                                 | KO            | TCW1EKO-1A12                | TCW1_KO1         | Normal    | 1      |
|               |                                 | KO            | TCW1EKO-1B2                 | TCW1_KO2         | Normal    | 1      |
|               |                                 | KO            | TCW1EKO-1B12                | TCW1_KO3         | Normal    | 1      |
| Indiv2        | ID10                            | 33            | TCW2E33-2E3                 | TCW2_33A         | Normal    | 1      |
|               |                                 | 33            | TCW2E33-3A5                 | TCW2_33B         | Normal    | 0.9999 |
|               |                                 | 33            | TCW2E33-3D11                | TCW2_33C         | Normal    | 0.9999 |
|               |                                 | 44            | TCW2E44-4B1                 | TCW2_44a         | Normal    | 1      |
|               |                                 | 44            | TCW2E44-4B4                 | TCW2_44b         | Normal    | 1      |
|               |                                 | 44            | TCW2E44-4B12                | TCW2_44c         | Normal    | 1      |
|               |                                 | KO            | TCW2EKO-3A5                 | TCW2_KO1         | Normal    | 1      |
|               |                                 | KO            | TCW2EKO-3A12                | TCW2_KO2         | Normal    | 1      |
|               |                                 | KO            | TCW2EKO-3D10                | TCW2_KO3         | Normal    | 1      |
| Indiv3        | ID11                            | 33            | TCW3E33-RC1B                | RC1B_33          | Normal    | 0.9953 |
|               |                                 | 33            | TCW3E33-RC1H                | RC1H_33          | Normal    | 1      |
|               |                                 | 33            | TCW3E33-RC1I                | RC1I_33          | Normal    | 0.9968 |
|               |                                 | 44            | TCW3E44-CD1D                | CD1D_44          | Normal    | 1      |
|               |                                 | 44            | TCW3E44-CD1D_2              | CD1D_2_44        | Normal    | 1      |
|               |                                 | 44            | TCW3E44-CD1F                | CD1F_44          | Normal    | 1      |
| Indiv4        | ID1                             | 33            | TCW4E33-MC2C                | MC2C_33          | Normal    | 1      |
|               |                                 | 33            | TCW4E33-MC2E                | MC2E_33          | Normal    | 1      |
|               |                                 | 33            | TCW4E33-MC2F                | MC2F_33          | Normal    | 0.9998 |
|               |                                 | 44            | TCW4E44-RC2C                | RC2C_44          | Normal    | 1      |
|               |                                 | 44            | TCW4E44-RC2G                | RC2G_44          | Normal    | 1      |
|               |                                 | 44            | TCW4E44-RC2I                | RC2I_44          | Normal    | 1      |

**Table S4 Genetic identity-by-descent estimation of genome-edited isogenic APOE hiPSC lines to original source fibroblasts, Related to Figures 3, 6-7.**

| haplotype_sequence | TCW_ID                            | TCW_Hap | 1000G haplotype name | 1000G Frequency |
|--------------------|-----------------------------------|---------|----------------------|-----------------|
| GCGAATACTCAGTTG    | Fibroblast_APOE44_ID.8_hap1       | HAPLO1  | hap.03               | 34              |
| ATAGAGACTCAGCTA    | Fibroblast_APOE44_ID.8_hap2       | HAPLO2  | NA.02                | NA              |
| GCGAATACTCAGTTG    | Population_APOE44_ID.8_hap1       | HAPLO1  | hap.03               | 34              |
| ATAGAGACTCAGCTA    | Population_APOE44_ID.8_hap2       | HAPLO2  | NA.02                | NA              |
| GCGAATACTCAGTTG    | Isogenic_APOE33_TCW1E33-1C6_hap1  | HAPLO1  | hap.03               | 34              |
| ATAGAGACTCAGCTA    | Isogenic_APOE33_TCW1E33-1C6_hap2  | HAPLO2  | NA.02                | NA              |
| GCGAATACTCAGTTG    | Isogenic_APOE33_TCW1E33-1C8_hap1  | HAPLO1  | hap.03               | 34              |
| ATAGAGACTCAGCTA    | Isogenic_APOE33_TCW1E33-1C8_hap2  | HAPLO2  | NA.02                | NA              |
| GCGAATACTCAGTTG    | Isogenic_APOE33_TCW1E33-1F1_hap1  | HAPLO1  | hap.03               | 34              |
| ATAGAGACTCAGCTA    | Isogenic_APOE33_TCW1E33-1F1_hap2  | HAPLO2  | NA.02                | NA              |
| GCGAATACTCAGTTG    | Isogenic_APOE44_TCW1E44-2C2_hap1  | HAPLO1  | hap.03               | 34              |
| ATAGAGACTCAGCTA    | Isogenic_APOE44_TCW1E44-2C2_hap2  | HAPLO2  | NA.02                | NA              |
| GCGAATACTCAGTTG    | Isogenic_APOE44_TCW1E44-2E3_hap1  | HAPLO1  | hap.03               | 34              |
| ATAGAGACTCAGCTA    | Isogenic_APOE44_TCW1E44-2E3_hap2  | HAPLO2  | NA.02                | NA              |
| GCGAATACTCAGTTG    | Isogenic_APOE44_TCW1E44-1D1_hap1  | HAPLO1  | hap.03               | 34              |
| ATAGAGACTCAGCTA    | Isogenic_APOE44_TCW1E44-1D1_hap2  | HAPLO2  | NA.02                | NA              |
| GCGAATACTCAGTTG    | Isogenic_APOEKO_TCW1EKO-1A12_hap1 | HAPLO1  | hap.03               | 34              |
| ATAGAGACTCAGCTA    | Isogenic_APOEKO_TCW1EKO-1A12_hap2 | HAPLO2  | NA.02                | NA              |
| GCGAATACTCAGTTG    | Isogenic_APOEKO_TCW1EKO-1B2_hap1  | HAPLO1  | hap.03               | 34              |
| ATAGAGACTCAGCTA    | Isogenic_APOEKO_TCW1EKO-1B2_hap2  | HAPLO2  | NA.02                | NA              |
| GCGAATACTCAGTTG    | Isogenic_APOEKO_TCW1EKO-1B12_hap1 | HAPLO1  | hap.03               | 34              |
| ATAGAGACTCAGCTA    | Isogenic_APOEKO_TCW1EKO-1B12_hap2 | HAPLO2  | NA.02                | NA              |
| GCGAATACTCAGTTG    | Fibroblast_APOE44_ID.10_hap1      | HAPLO1  | hap.03               | 34              |
| GCGAATACTCAGTTG    | Fibroblast_APOE44_ID.10_hap2      | HAPLO2  | hap.03               | 34              |
| GCGAATACTCAGTTG    | Population_APOE44_ID.10_hap1      | HAPLO1  | hap.03               | 34              |
| GCGAATACTCAGTTG    | Population_APOE44_ID.10_hap2      | HAPLO2  | hap.03               | 34              |
| GCGAATACTCAGTTG    | Isogenic_APOE33_TCW2E33-2E3_hap1  | HAPLO1  | hap.03               | 34              |
| GCGAATACTCAGTTG    | Isogenic_APOE33_TCW2E33-2E3_hap2  | HAPLO2  | hap.03               | 34              |
| GCGAATACTCAGTTG    | Isogenic_APOE33_TCW2E33-3A5_hap1  | HAPLO1  | hap.03               | 34              |
| GCGAATACTCAGTTG    | Isogenic_APOE33_TCW2E33-3A5_hap2  | HAPLO2  | hap.03               | 34              |
| GCGAATACTCAGTTG    | Isogenic_APOE33_TCW2E33-3D11_hap1 | HAPLO1  | hap.03               | 34              |
| GCGAATACTCAGTTG    | Isogenic_APOE33_TCW2E33-3D11_hap2 | HAPLO2  | hap.03               | 34              |
| GCGAATACTCAGTTG    | Isogenic_APOE44_TCW2E44-4B1_hap1  | HAPLO1  | hap.03               | 34              |
| GCGAATACTCAGTTG    | Isogenic_APOE44_TCW2E44-4B1_hap2  | HAPLO2  | hap.03               | 34              |
| GCGAATACTCAGTTG    | Isogenic_APOE44_TCW2E44-4B4_hap1  | HAPLO1  | hap.03               | 34              |
| GCGAATACTCAGTTG    | Isogenic_APOE44_TCW2E44-4B4_hap2  | HAPLO2  | hap.03               | 34              |
| GCGAATACTCAGTTG    | Isogenic_APOE44_TCW2E44-4B12_hap1 | HAPLO1  | hap.03               | 34              |
| GCGAATACTCAGTTG    | Isogenic_APOE44_TCW2E44-4B12_hap2 | HAPLO2  | hap.03               | 34              |
| GCGAATACTCAGTTG    | Isogenic_APOEKO_TCW2EKO-3A5_hap1  | HAPLO1  | hap.03               | 34              |
| GCGAATACTCAGTTG    | Isogenic_APOEKO_TCW2EKO-3A5_hap2  | HAPLO2  | hap.03               | 34              |
| GCGAATACTCAGTTG    | Isogenic_APOEKO_TCW2EKO-3A12_hap1 | HAPLO1  | hap.03               | 34              |

|                 |                                   |        |        |    |
|-----------------|-----------------------------------|--------|--------|----|
| GCGAATACTCAGTTG | Isogenic_APOEKO_TCW2EKO-3A12_hap2 | HAPLO2 | hap.03 | 34 |
| GCGAATACTCAGTTG | Isogenic_APOEKO_TCW2EKO-3D10_hap1 | HAPLO1 | hap.03 | 34 |
| GCGAATACTCAGTTG | Isogenic_APOEKO_TCW2EKO-3D10_hap2 | HAPLO2 | hap.03 | 34 |
| GCGAATACTCAGCGA | Fibroblast_APOE44_ID.11_hap1      | HAPLO1 | hap.17 | 12 |
| GTGGATACTCAGCGA | Fibroblast_APOE44_ID.11_hap2      | HAPLO2 | NA.03  | NA |
| GCGAATACTCAGCGA | Population_APOE44_ID.11_hap1      | HAPLO1 | hap.17 | 12 |
| GTGGATACTCAGCGA | Population_APOE44_ID.11_hap2      | HAPLO2 | NA.03  | NA |
| GCGAATACTCAGCGA | Isogenic_APOE33_TCW3E33-RC1B_hap1 | HAPLO1 | hap.17 | 12 |
| GTGGATACTCAGCGA | Isogenic_APOE33_TCW3E33-RC1B_hap2 | HAPLO2 | NA.03  | NA |
| GCGAATACTCAGCGA | Isogenic_APOE33_TCW3E33-RC1H_hap1 | HAPLO1 | hap.17 | 12 |
| GTGGATACTCAGCGA | Isogenic_APOE33_TCW3E33-RC1H_hap2 | HAPLO2 | NA.03  | NA |
| GCGAATACTCAGCGA | Isogenic_APOE33_TCW3E33-RC1I_hap1 | HAPLO1 | hap.17 | 12 |
| GTGGATACTCAGCGA | Isogenic_APOE33_TCW3E33-RC1I_hap2 | HAPLO2 | NA.03  | NA |
| GCGAATACTCAGCGA | Isogenic_APOE44_TCW3E44-CD1D_hap1 | HAPLO1 | hap.17 | 12 |
| GTGGATACTCAGCGA | Isogenic_APOE44_TCW3E44-CD1D_hap2 | HAPLO2 | NA.03  | NA |
| GCGAATACTCAGCGA | Isogenic_APOE44_TCW3E44-CD1F_hap1 | HAPLO1 | hap.17 | 12 |
| GTGGATACTCAGCGA | Isogenic_APOE44_TCW3E44-CD1F_hap2 | HAPLO2 | NA.03  | NA |
| GCGAAGGTGCGATTG | Fibroblast_APOE33_ID.1_hap1       | HAPLO1 | hap.02 | 47 |
| GTAGAGGTGCGACGA | Fibroblast_APOE33_ID.1_hap2       | HAPLO2 | hap.23 | 10 |
| GCGAAGGTGCGATTG | Population_APOE33_ID.1_hap1       | HAPLO1 | hap.02 | 47 |
| GTAGAGGTGCGACGA | Population_APOE33_ID.1_hap2       | HAPLO2 | hap.23 | 10 |
| GCGAAGGTGCGATTG | Isogenic_APOE33_TCW4E33-MC2C_hap1 | HAPLO1 | hap.02 | 47 |
| GTAGAGGTGCGACGA | Isogenic_APOE33_TCW4E33-MC2C_hap2 | HAPLO2 | hap.23 | 10 |
| GCGAAGGTGCGATTG | Isogenic_APOE33_TCW4E33-MC2E_hap1 | HAPLO1 | hap.02 | 47 |
| GTAGAGGTGCGACGA | Isogenic_APOE33_TCW4E33-MC2E_hap2 | HAPLO2 | hap.23 | 10 |
| GCGAAGGTGCGATTG | Isogenic_APOE33_TCW4E33-MC2F_hap1 | HAPLO1 | hap.02 | 47 |
| GTAGAGGTGCGACGA | Isogenic_APOE33_TCW4E33-MC2F_hap2 | HAPLO2 | hap.23 | 10 |
| GCGAAGGTGCGATTG | Isogenic_APOE44_TCW4E44-RC2C_hap1 | HAPLO1 | hap.02 | 47 |
| GTAGAGGTGCGACGA | Isogenic_APOE44_TCW4E44-RC2C_hap2 | HAPLO2 | hap.23 | 10 |
| GCGAAGGTGCGATTG | Isogenic_APOE44_TCW4E44-RC2G_hap1 | HAPLO1 | hap.02 | 47 |
| GTAGAGGTGCGACGA | Isogenic_APOE44_TCW4E44-RC2G_hap2 | HAPLO2 | hap.23 | 10 |
| GCGAAGGTGCGATTG | Isogenic_APOE44_TCW4E44-RC2I_hap1 | HAPLO1 | hap.02 | 47 |
| GTAGAGGTGCGACGA | Isogenic_APOE44_TCW4E44-RC2I_hap2 | HAPLO2 | hap.23 | 10 |

**Table S5 APOE local haplotype sequences and frequency of TCW lines (fibroblasts, population iPSCs, isogenic iPSCs), Related to Figures 1 and 3.**

Abbreviations: TCW\_Hap, Haplotype definition of TCW lines; NA, not applicable. See Table S8 for a list and description of all APOE local haplotypes from the 1000G project. See Table S8 for the 1000G reference sequences.

| <b>Brain banks</b>               | <b>MSBB</b> |          |          |          | <b>ROSMAP</b> |
|----------------------------------|-------------|----------|----------|----------|---------------|
| Brain regions                    | PFC         | STG      | PHG      | IFG      | DLPFC         |
| Number of <i>APOE</i> 44 AD      | 9           | 10       | 7        | 8        | 5             |
| Number of <i>APOE</i> 33 AD      | 46          | 44       | 42       | 45       | 55            |
| Number of <i>APOE</i> 33 Control | 15          | 12       | 13       | 11       | 55            |
| Age (years)                      | 85.2±9.6    | 85.0±9.6 | 85.0±9.7 | 85.3±9.7 | 86.7±4.5      |
| Male (%)                         | 35.6        | 37.5     | 38.1     | 36.0     | 35.8          |
| Number of CDR = 0                | 35          | 33       | 32       | 27       | 198           |
| Number of CDR = 0.5              | 39          | 33       | 32       | 38       | 167           |
| Number of CDR >= 1               | 187         | 174      | 151      | 157      | 246           |
| Total                            | 261         | 240      | 215      | 222      | 623           |

**Table S6 Demographics and disease status of the brain bank cohorts, Related to Figure 4.**

Abbreviations: *APOE*, apolipoprotein E; AD, Alzheimer's disease; MSBB, Mount Sinai Brain Bank; ROSMAP, the Religious Orders Study (ROS) and the Memory and Aging Project (MAP); PFC, prefrontal cortex, STG, superior temporal gyrus; PHG, parahippocampal gyrus; IFG, inferior frontal gyrus; DLPFC, dorsolateral prefrontal cortex; CDR, Clinical Dementia Rating.

| Cell | Region | Comparison                    | p-value | FDR   |
|------|--------|-------------------------------|---------|-------|
| mic  | BA10   | APOE 44 AD vs APOE 33 AD      | 0.272   | 0.612 |
| mic  | BA10   | APOE 44 AD vs APOE 33 Control | 0.223   | 0.582 |
| mic  | BA10   | APOE 33 AD vs APOE 33 Control | 0.586   | 0.823 |
| mic  | BA22   | APOE 44 AD vs APOE 33 AD      | 0.049   | 0.330 |
| mic  | BA22   | APOE 44 AD vs APOE 33 Control | 0.018   | 0.221 |
| mic  | BA22   | APOE 33 AD vs APOE 33 Control | 0.306   | 0.612 |
| mic  | BA36   | APOE 44 AD vs APOE 33 AD      | 0.604   | 0.823 |
| mic  | BA36   | APOE 44 AD vs APOE 33 Control | 0.033   | 0.288 |
| mic  | BA36   | APOE 33 AD vs APOE 33 Control | 0.013   | 0.199 |
| mic  | BA44   | APOE 44 AD vs APOE 33 AD      | 0.198   | 0.566 |
| mic  | BA44   | APOE 44 AD vs APOE 33 Control | 0.116   | 0.439 |
| mic  | BA44   | APOE 33 AD vs APOE 33 Control | 0.393   | 0.674 |

| Cell | Region | Comparison                    | p-value | FDR   |
|------|--------|-------------------------------|---------|-------|
| neu  | BA10   | APOE 44 AD vs APOE 33 AD      | 0.944   | 0.973 |
| neu  | BA10   | APOE 44 AD vs APOE 33 Control | 0.265   | 0.612 |
| neu  | BA10   | APOE 33 AD vs APOE 33 Control | 0.219   | 0.582 |
| neu  | BA22   | APOE 44 AD vs APOE 33 AD      | 0.814   | 0.921 |
| neu  | BA22   | APOE 44 AD vs APOE 33 Control | 0.160   | 0.483 |
| neu  | BA22   | APOE 33 AD vs APOE 33 Control | 0.041*  | 0.311 |
| neu  | BA36   | APOE 44 AD vs APOE 33 AD      | 0.441   | 0.679 |
| neu  | BA36   | APOE 44 AD vs APOE 33 Control | 0.111   | 0.439 |
| neu  | BA36   | APOE 33 AD vs APOE 33 Control | 0.006*  | 0.148 |
| neu  | BA44   | APOE 4 AD vs APOE 33 AD       | 0.441   | 0.679 |
| neu  | BA44   | APOE 44 AD vs APOE 33 Control | 0.957   | 0.973 |
| neu  | BA44   | APOE 33 AD vs APOE 33 Control | 0.644   | 0.829 |

| Cell | Region | Comparison                    | p-value | FDR   |
|------|--------|-------------------------------|---------|-------|
| ast  | BA10   | APOE 44 AD vs APOE 33 AD      | 0.694   | 0.852 |
| ast  | BA10   | APOE 44 AD vs APOE 33 Control | 0.288   | 0.612 |
| ast  | BA10   | APOE 33 AD vs APOE 33 Control | 0.422   | 0.679 |
| ast  | BA22   | APOE 44 AD vs APOE 33 AD      | 0.088   | 0.438 |
| ast  | BA22   | APOE44 AD vs APOE 33 Control  | 0.466   | 0.699 |
| ast  | BA22   | APOE 33 AD vs APOE33 Control  | 0.696   | 0.852 |
| ast  | BA36   | APOE 44 AD vs APOE 33 AD      | 0.026   | 0.260 |
| ast  | BA36   | APOE 44 AD vs APOE 33 Control | 0.347   | 0.632 |
| ast  | BA36   | APOE 33 AD vs APOE 33 Control | 0.093   | 0.438 |
| ast  | BA44   | APOE 44 AD vs APOE 33 AD      | 0.121   | 0.439 |
| ast  | BA44   | APOE 44 AD vs APOE 33 Control | 0.161   | 0.483 |
| ast  | BA44   | APOE 33 AD vs APOE 33 Control | 0.417   | 0.679 |

| Cell | Region | Comparison                    | p-value | FDR   |
|------|--------|-------------------------------|---------|-------|
| end  | BA10   | APOE 44 AD vs APOE 33 AD      | 0.979   | 0.979 |
| end  | BA10   | APOE 44 AD vs APOE 33 Control | 0.378   | 0.667 |

|     |      |                                             |       |       |
|-----|------|---------------------------------------------|-------|-------|
| end | BA10 | <i>APOE</i> 33 AD vs <i>APOE</i> 33 Control | 0.302 | 0.612 |
| end | BA22 | <i>APOE</i> 44 AD vs <i>APOE</i> 33 AD      | 0.900 | 0.948 |
| end | BA22 | <i>APOE</i> 44 AD vs <i>APOE</i> 33 Control | 0.007 | 0.148 |
| end | BA22 | <i>APOE</i> 33 AD vs <i>APOE</i> 33 Control | 0.003 | 0.148 |
| end | BA36 | <i>APOE</i> 44 AD vs <i>APOE</i> 33 AD      | 0.732 | 0.861 |
| end | BA36 | <i>APOE</i> 44 AD vs <i>APOE</i> 33 Control | 0.347 | 0.632 |
| end | BA36 | <i>APOE</i> 33 AD vs <i>APOE</i> 33 Control | 0.278 | 0.612 |
| end | BA44 | <i>APOE</i> 44 AD vs <i>APOE</i> 33 AD      | 0.145 | 0.483 |
| end | BA44 | <i>APOE</i> 44 AD vs <i>APOE</i> 33 Control | 0.124 | 0.439 |
| end | BA44 | <i>APOE</i> 33 AD vs <i>APOE</i> 33 Control | 0.649 | 0.829 |

  

| Cell | Region | Comparison                                  | p-value | FDR   |
|------|--------|---------------------------------------------|---------|-------|
| oli  | BA10   | <i>APOE</i> 44 AD vs <i>APOE</i> 33 AD      | 0.852   | 0.929 |
| oli  | BA10   | <i>APOE</i> 44 AD vs <i>APOE</i> 33 Control | 0.532   | 0.779 |
| oli  | BA10   | <i>APOE</i> 33 AD vs <i>APOE</i> 33 Control | 0.618   | 0.825 |
| oli  | BA22   | <i>APOE</i> 44 AD vs <i>APOE</i> 33 AD      | 0.339   | 0.632 |
| oli  | BA22   | <i>APOE</i> 44 AD vs <i>APOE</i> 33 Control | 0.598   | 0.823 |
| oli  | BA22   | <i>APOE</i> 33 AD vs <i>APOE</i> 33 Control | 0.233   | 0.582 |
| oli  | BA36   | <i>APOE</i> 44 AD vs <i>APOE</i> 33 AD      | 0.094   | 0.438 |
| oli  | BA36   | <i>APOE</i> 44 AD vs <i>APOE</i> 33 Control | 0.069   | 0.415 |
| oli  | BA36   | <i>APOE</i> 33 AD vs <i>APOE</i> 33 Control | 0.720   | 0.861 |
| oli  | BA44   | <i>APOE</i> 44 AD vs <i>APOE</i> 33 AD      | 0.882   | 0.945 |
| oli  | BA44   | <i>APOE</i> 44 AD vs <i>APOE</i> 33 Control | 0.847   | 0.929 |
| oli  | BA44   | <i>APOE</i> 33 AD vs <i>APOE</i> 33 Control | 0.749   | 0.865 |

**Table S7 Cell type proportion changes by *APOE* genotype or AD phenotype, Related to Figure 4.**

Abbreviations: BA, Brodmann Area, mic, microglia; neu, neurons; ast, astrocytes; end, endothelial cells; oli, oligodendrocytes.

| <i>APOE</i> genotype | Sex                           | Dx | Ethnicity | Age of death, year   | PMI, hour   | Tangle Stage  | Plaque Stage |
|----------------------|-------------------------------|----|-----------|----------------------|-------------|---------------|--------------|
| 33                   | Female                        | AD | Caucasian | 89                   | 4.08        | Stage 6       | Stage C      |
| 33                   | Female                        | AD | Other     | 90                   | 6.58        | Stage 6       | Stage C      |
| 33                   | Male                          | AD | Caucasian | 71                   | 4           | Stage 4       | Stage B      |
| 33                   | Male                          | AD | Caucasian | 76                   | 3.75        | Stage 6       | Stage C      |
| 44                   | Female                        | AD | Caucasian | 89                   | 8.3         | Stage 4       | Stage B      |
| 44                   | Female                        | AD | Caucasian | 89                   | 3.67        | Stage 5       | Stage C      |
| 44                   | Male                          | AD | Caucasian | 71                   | 3.83        | Stage 4       | Stage C      |
| 44                   | Male                          | AD | Caucasian | 71                   | 5.62        | Stage 4       | Stage C      |
| <i>APOE</i> genotype | Total subjects = Male+ Female |    |           | Average Age of death | Average PMI | Average Stage |              |
| 33                   | 4 = 2 + 2                     |    |           | 81.5                 | 4.60        | 5.5           |              |
| 44                   | 4 = 2 + 2                     |    |           | 80.0                 | 5.35        | 4.3           |              |

**Table S8 Phenotype of selected *APOE* AD individuals for post-mortem brain analysis, Related to Figure 6.**
